# Supplementary material for: Extraction of a target in sea clutter via signal decomposition
Source: Springer Nature journal article supplement (doi:10.1007/s11432-018-9859-4), 2019-09-24
Supplement: 11432_2018_9859_MOESM1_ESM.pdf [file 11432_2018_9859_MOESM1_ESM.pdf]

## Appendix A

---

**Citation** Shao Z Y, He J H, Feng S S. Extraction of target in sea clutter via signal decomposition. Sci China Inf Sci, for review

---

The algorithm SALSA in this paper is used to solve the following problem

$$\{\hat{w}_1, \hat{w}_2\} = \arg \min_{w_1, w_2} \|\lambda w_1\|_1 + \|(1 - \lambda) w_2\|_1 \quad (1)$$

$$s.t. \quad x = FrFT_{-opt}(w_1) + ISTFT(w_2) \quad (2)$$

For the sake of simplicity, we replace  $FrFT_{-opt}$  with  $\Phi_1^*$  and  $ISTFT$  with  $\Phi_2^*$ . As follows

$$\{\hat{w}_1, \hat{w}_2\} = \arg \min_{w_1, w_2} \|\lambda w_1\|_1 + \|(1 - \lambda) w_2\|_1 \quad (3)$$

$$s.t. \quad x = \Phi_1^*(w_1) + \Phi_2^*(w_2) \quad (4)$$

We consider the optimization problem by the alternating direction method of multipliers (ADMM), which use iterative methods to solve problems. As is shown in the following

Initialize :  $\mu > 0, d_i, i = 1, 2$

$$w_i, u_i \begin{cases} \arg \min_{w_i, u_i} \|\lambda * u_1\|_1 + \|(1 - \lambda) * u_2\|_1 \\ + \mu_1 \|u_1 - w_1 - d_1\|_2^2 \\ + \mu_2 \|u_2 - w_2 - d_2\|_2^2 \\ such.that : x = \Phi_1^* w_1 + \Phi_2^* w_2 \\ d_1 = d_1 - (u_1 - w_1) \\ d_2 = d_2 - (u_2 - w_2) \end{cases} \quad (5)$$

Repeat

To alternate between  $w$  and  $u$  minimization, we

Email:

obtain the algorithm.

Initialize :  $\mu > 0, d_i, i = 1, 2$

$$u_i \leftarrow \arg \min_{u_i} \|\lambda * u_1\|_1 + \|(1 - \lambda) * u_2\|_1$$

$$+ \mu_1 \|u_1 - w_1 - d_1\|_2^2$$

$$+ \mu_2 \|u_2 - w_2 - d_2\|_2^2$$

$$w_i \begin{cases} \arg \min_{w_i} \|u_1 - w_1 - d_1\|_2^2 \\ + \|u_2 - w_2 - d_2\|_2^2 \\ such.that : x = \Phi_1^* w_1 + \Phi_2^* w_2 \end{cases} \quad (6)$$

$$d_i = d_i - (u_i - w_i)$$

Repeat

The minimization problem in (6) can be broken down into two problems, where the one is soft-thresholding problem. That is, the minimizer  $u$  of  $\|\lambda u\|_1 + \|u - y\|_2^2$  is solved by  $u = soft(y, 0.5\lambda)$ .  $soft(y, T)$  is soft-threshold rule with threshold  $T$ , and that is

$$soft(y, T) = sign(y)(|y| - T), y \in C, T \in R_+ \quad (7)$$

The another problem can be considered as least squares problem, which can be given in matrix form. When these two problems are simplified, we define  $v = u - d$  and further simplify the equations. The algorithm can be depicted as

Initialize :  $\mu > 0, d_i, i = 1, 2$

$$v_i \leftarrow soft(w_i + d_i, 0.5\lambda/\mu) - d_i$$

$$d_i \leftarrow \Phi_i^* (\Phi_i^* \Phi_i)^{-1} (x - \Phi_i^* v_i) \quad (8)$$

$$w_i = d_i + v_i$$

Repeat

We assume that  $\Phi_i$  is self-inverting transforms, that is  $\Phi_1^*\Phi_1 = I, \Phi_2^*\Phi_2 = I$ , therefore, we can write

$$\Phi_i^*\Phi_i = [\Phi_1^*\Phi_2^*] \begin{bmatrix} \Phi_1 \\ \Phi_2 \end{bmatrix} = \Phi_1^*\Phi_1 + \Phi_2^*\Phi_2 = 2I \quad (9)$$

After putting (9) in (8), which gives the following result.

$$\begin{aligned} &\text{Initialize : } \mu > 0, d_i, i = 1, 2 \\ &u_i \leftarrow \text{soft}(w_i + d_i, 0.5\lambda/\mu) - d_i \\ &d_i \leftarrow \frac{1}{2}\Phi_i^*(x - \Phi_i^*u_i) \\ &w_i = d_i + u_i \\ &\text{Repeat} \end{aligned} \quad (10)$$

Finally, we rewritten (10), and the proposed algorithm steps can be summarized as follows.

$$\begin{aligned} &\text{Initialize : } \mu > 0, d_i, w_i \\ &\begin{cases} u_1 \leftarrow \text{soft}(w_1 + d_1, 0.5\lambda_1/\mu) - d_1 \\ u_2 \leftarrow \text{soft}(w_2 + d_2, 0.5\lambda_2/\mu) - d_2 \end{cases} \\ &R \leftarrow x - \Phi_1^*u_1 - \Phi_2^*u_2 \\ &\begin{cases} d_1 \leftarrow \frac{1}{2}\Phi_1c \\ d_2 \leftarrow \frac{1}{2}\Phi_2c \\ w_1 = d_1 + u_1 \\ w_2 = d_2 + u_2 \end{cases} \\ &\text{Repeat} \end{aligned} \quad (11)$$

The Algorithm 1 in the paper can be obtained by replacing  $\Phi_1^*$  with  $FrFT_{\text{-opt}}$ ,  $\Phi_2^*$  with  $ISTFT$ , as shown below.

$$\begin{aligned} &\text{Initialize : } \mu > 0, d_i, w_i \\ &\begin{cases} u_1 \leftarrow \text{soft}(w_1 + d_1, 0.5\lambda_1/\mu) - d_1 \\ u_2 \leftarrow \text{soft}(w_2 + d_2, 0.5\lambda_2/\mu) - d_2 \end{cases} \\ &R \leftarrow x - FrFT_{\text{-opt}}(u_1) - ISTFT(u_2) \\ &\begin{cases} d_1 \leftarrow \frac{1}{2}FrFT_{\text{-opt}}(R) \\ d_2 \leftarrow \frac{1}{2}ISTFT(R) \\ w_1 = d_1 + u_1 \\ w_2 = d_2 + u_2 \end{cases} \\ &\text{Repeat} \end{aligned} \quad (12)$$
